# Supplementary material
Source: PubMed Central journal article supplement (PMC10363856)
Supplement: NIHMS1865249-supplement-Supplementary_data.pdf [file NIHMS1865249-supplement-Supplementary_data.pdf]

Supplemental Table S1: Conversion table used to construct linearized estimates for each MFM data in each MFM domain (D1, D2 and D3): ordinal level score (raw score) to linearized person estimates (logit)

| <b>MFM D1 Domain</b> |              | <b>MFM D2 Domain</b> |              | <b>MFM D3 Domain</b> |              |
|----------------------|--------------|----------------------|--------------|----------------------|--------------|
| <b>Raw Score</b>     | <b>Logit</b> | <b>Raw Score</b>     | <b>Logit</b> | <b>Raw Score</b>     | <b>Logit</b> |
| 0                    | -5.133       | 0                    | -3.958       | 0                    | -5.519       |
| 1                    | -4.055       | 1                    | -3.032       | 3                    | -2.27        |
| 2                    | -3.243       | 2                    | -2.386       | 4                    | -1.72        |
| 3                    | -2.632       | 3                    | -1.936       | 5                    | -1.266       |
| 4                    | -2.147       | 4                    | -1.574       | 6                    | -0.852       |
| 5                    | -1.753       | 5                    | -1.258       | 7                    | -0.446       |
| 6                    | -1.424       | 6                    | -0.97        | 8                    | -0.029       |
| 7                    | -1.141       | 7                    | -0.7         | 9                    | 0.412        |
| 8                    | -0.892       | 8                    | -0.444       | 10                   | 0.895        |
| 9                    | -0.665       | 9                    | -0.196       | 11                   | 1.449        |
| 10                   | -0.456       | 10                   | 0.045        | 12                   | 2.124        |
| 11                   | -0.257       | 11                   | 0.286        | 13                   | 2.984        |
| 12                   | -0.064       | 12                   | 0.529        | 14                   | 4.021        |
| 13                   | 0.125        | 13                   | 0.78         | 15                   | 5.271        |
| 14                   | 0.315        | 14                   | 1.048        |                      |              |
| 15                   | 0.507        | 15                   | 1.341        |                      |              |
| 16                   | 0.704        | 16                   | 1.675        |                      |              |
| 17                   | 0.908        | 17                   | 2.07         |                      |              |
| 18                   | 1.121        | 18                   | 2.561        |                      |              |
| 19                   | 1.346        | 19                   | 3.224        |                      |              |
| 20                   | 1.588        | 20                   | 4.12         |                      |              |
| 21                   | 1.851        |                      |              |                      |              |
| 22                   | 2.146        |                      |              |                      |              |
| 23                   | 2.488        |                      |              |                      |              |
| 24                   | 2.914        |                      |              |                      |              |
| 25                   | 3.511        |                      |              |                      |              |
| 26                   | 4.351        |                      |              |                      |              |
